# Supplementary material for: Perspective on the Use of DNA Repair Inhibitors as a Tool for Imaging and Radionuclide Therapy of Glioblastoma
Source: MDPI journal article supplement (doi:10.3390/cancers14071821), 2022-04-03
Supplement: s1 [file s1]

# Supplementary Material: Perspective on the Use of DNA Repair Inhibitors as a Tool for Imaging and Radionuclide Therapy of Glioblastoma

Liesbeth Everix, Shankari Nair, Cathryn H. S. Driver, Ingeborg Goethals, Mike M. Sathekge, Thomas Ebenhan, Charlot Vandevorode and Julie Bolcaen

**Table S1.** Overview of cancer clinical trials of ATMi and ATRi.

| Target | Drug                                        | Combined Therapy*                            | Clinical Phase | Condition/Disease                  | Biomarker Selection/Evaluation                                             | Trial Number (Status) Reference |
|--------|---------------------------------------------|----------------------------------------------|----------------|------------------------------------|----------------------------------------------------------------------------|---------------------------------|
| ATM    | AZD1390                                     | RT                                           | I              | GB, Brain neoplasms, malignant LMD | /                                                                          | NCT03423628 (r)                 |
| ATM    | AZD0156                                     | Olaparib/Irinotecan/ Fluorouracil/Leucovorin | I              | AST (including glioma)             | /                                                                          | NCT02588105 (anr)               |
| ATM    | KU-60019                                    | CK2 (CX4945)                                 | NA             | Kidney C                           | /                                                                          | NCT03571438 (r)                 |
| ATM    | M3541                                       | RT                                           | I              | ST                                 | /                                                                          | NCT03225105 (c)                 |
| ATR    | VX-970 (VE-822, M6620, berzosertib, Merck®) | /                                            | II             | AST                                | ATRX, ATM, HRR, BRCA, MYC, FBXW7, or cyclin E changes; γH2AX, phospho-CHK1 | NCT03718091 (anr)               |
|        |                                             | Carboplatin/Gemcitabine                      | II             | OC, PFTC                           | /                                                                          | NCT02595892 (anr)               |
|        |                                             | Topotecan                                    | II             | SCLC and SCC                       | /                                                                          | NCT03896503 (s)                 |
|        |                                             | Cisplatin/ Gemcitabine                       | II             | mUC                                | p53/p21/ERCC2 mut                                                          | NCT02567409 (anr)               |
|        |                                             | Irinotecan                                   | II             | GEJC                               | TP53 mut, DDR mut                                                          | NCT03641313 (s)                 |
|        |                                             | Carboplatin/ Docetaxel                       | II             | mCRPC                              | DNA damage assay, HRR mut                                                  | NCT03517969 (anr)               |
|        |                                             | Carboplatin/Gemcitabine/ Pembrolizumab       | I/II           | NSCLC                              | ATM mut                                                                    | NCT04216316 (r)                 |
|        |                                             | Topotecan                                    | I/II           | SCC                                | /                                                                          | NCT02487095 (anr)               |
|        |                                             | Avelumab                                     | I/II           | mST/uST                            | DDR mut                                                                    | NCT04266912 (r)                 |
|        |                                             | Veliparib/cisplatin                          | I              | AST                                | γH2AX/RAD51/NBS1/pKAP-1 (DNA damage and apoptosis)                         | NCT02723864 (c)                 |
|        |                                             | Whole brain RT                               | I              | BM-NSCLC/SCLC/ NET                 | ATR/CHK1/RAD51                                                             | NCT02589522 (anr)               |
|        |                                             | RT                                           | I              | HER2 Negative BC                   | DNA damage assay, HRR mut                                                  | NCT04052555 (r)                 |
|        |                                             | Carboplatin/Gemcitabine                      | I              | OC, PFTC                           | ATR                                                                        | NCT02627443 (anr)               |
|        |                                             | Cisplatin/RT                                 | I              | HNSCC                              | DNA damage                                                                 | NCT02567422 (anr)               |
|        |                                             | Irinotecan                                   | I              | mST/uST                            | DDR mut                                                                    | NCT02595931 (r)                 |
| ATR    | AZD6738 (ceralasertib, Astra-Zeneca®)       | Cisplatin/Carboplatin/ Etoposide/ Durvalumab | II             | Advanced SCLC                      | /                                                                          | NCT04699838 (r)                 |
|        |                                             | Durvalumab/Olaparib                          | II             | Biliary Tract C                    | /                                                                          | NCT04298021 (r)                 |
|        |                                             | Cediranib/ Olaparib                          | II             | BC                                 | HER2, BRCA                                                                 | NCT04090567 (r)                 |

|     |                                        |                                          |       |                             |                                                                     |                       |
|-----|----------------------------------------|------------------------------------------|-------|-----------------------------|---------------------------------------------------------------------|-----------------------|
|     |                                        | Olaparib/AZD1775/<br>AZD5363             | II    | AST                         | IDH1-2/ATM/CHK2/ APOBEC<br>/MRE11/PTEN/PIK3CA/AKT/ ARID1A/TP53/KRAS | NCT02576444 (anr)     |
|     |                                        | Durvalumab                               | II    | Biliary Tract C             | /                                                                   | NCT04298008 (r)       |
|     |                                        | Durvalumab                               | II    | mST                         | /                                                                   | NCT03780608 (anr)     |
|     |                                        | Durvalumab                               | II    | NSCLC                       | /                                                                   | NCT03334617 (r)       |
|     |                                        | Durvalumab                               | II    | Advanced NSCLC              | Included (ns)                                                       | NCT03833440 (r)       |
|     |                                        | Durvalumab                               | II    | NSCLC                       | Included (ns)                                                       | NCT02664935 (anr)     |
|     |                                        | Olaparib                                 | II    | Relapsed SCLC               | /                                                                   | NCT03428607(c)        |
|     |                                        | Olaparib                                 | II    | Recurrent OC                | BRCA/other HRD mut                                                  | NCT03462342 (r)       |
|     |                                        | Olaparib                                 | II    | Gynaecological C            | ARID1A loss                                                         | NCT04065269 (r)       |
|     |                                        | Olaparib                                 | II    | ST                          | IDH1/IDH2 mut                                                       | NCT03878095 (r)       |
|     |                                        | Olaparib                                 | II    | mCRPC                       | BRCA, ATM                                                           | NCT03787680 (anr)     |
|     |                                        | Olaparib                                 | II    | Advanced SCLC               | /                                                                   | NCT02937818 (anr)     |
|     |                                        | Olaparib                                 | II    | Osteosarcoma                | /                                                                   | NCT04417062 (r)       |
|     |                                        | Olaparib                                 | II    | Advanced BC                 | ctDNA screening                                                     | NCT03182634 (r)       |
|     |                                        | Olaparib                                 | II    | mTNBC                       | BRCA1-2/HRR mut                                                     | NCT03330847 (anr)     |
|     |                                        | Olaparib                                 | II    | Selected ST                 | BAF250a/ARID1A/ATM                                                  | NCT03682289 (r)       |
|     |                                        | /                                        | II    | TNBC                        | Gene signature                                                      | NCT03740893 (r)       |
|     |                                        | /                                        | II    | AST                         | ATM mut                                                             | NCT04564027 (r)       |
|     |                                        | Paclitaxel                               | I (+) | Refractory C                | /                                                                   | [1]                   |
|     |                                        | Carboplatin                              | I (+) | AST                         | /                                                                   | [2]                   |
|     |                                        | Olaparib                                 | I     | HNSCC                       | 25-gene signature                                                   | NCT03022409 (c)       |
|     |                                        | Gemcitabine                              | I     | AST                         | /                                                                   | NCT03669601 (r)       |
|     |                                        | RT                                       | I     | ST                          | DDR mut                                                             | NCT02223923 (unknown) |
|     |                                        | DS-8201a                                 | I     | AST                         | HER2/TP53/ATM/RAS                                                   | NCT04704661 (r)       |
|     |                                        | Acalabrutinib                            | I     | CLL                         | /                                                                   | NCT03328273 (anr)     |
| ATR | VX-803 (M4344,<br>Merck®)              | Carboplatin                              | I     | AST                         | ARID1A/ATRX/DAXX/ ATM mut                                           | NCT02278250 (c)       |
|     |                                        | Niraparib                                | I     | PARP-resistant recurrent OC | /                                                                   | NCT04149145 (anr)     |
|     |                                        | Pembrolizumab/RT                         | I     | Recurrent HNSCC             | /                                                                   | NCT04576091 (r)       |
|     |                                        | Pembrolizumab                            | I     | AST                         | /                                                                   | NCT04095273 (r)       |
|     |                                        | /                                        | I     | AST and Lymphomas           | /                                                                   | NCT03188965 (r)       |
| ATR | BAY1895344<br>(elimusertib,<br>Bayer®) | Niraparib                                | I     | AST and OC                  | /                                                                   | NCT04267939 (r)       |
|     |                                        | Fluorouracil/Irinotecan/ Leuco-<br>vorin | I     | Stomach and Intestines C    | /                                                                   | NCT04535401 (r)       |
|     |                                        | Cisplatin/Gemcitabine                    | I     | AST – UC                    | /                                                                   | NCT04491942 (s)       |
|     |                                        | Gemcitabine                              | I     | Pancreatic C, OC, AST       | /                                                                   | NCT04616534 (s)       |
|     |                                        | Irinotecan/Topotecan                     | I     | NSCLC, PD-NEC, PDA          | /                                                                   | NCT04514497 (r)       |
| ATR | M1774                                  | Niraparib                                | I     | mST or locally AST/uST      | ARID1A/ATRX/DAXX/ATM mut                                            | NCT04170153 (r)       |
| ATR | RP-3500                                | Talazoparib/Gemcitabine                  | I/II  | AST                         | ATRI sensitizing mut, DNA damage                                    | NCT04497116 (r)       |

Applications in glioblastoma are highlighted in bold. \* AZD1775 (WEE1i), AZD5363 (AKTi), Carboplatin/Cisplatin/Docetaxel/Etoposide/Fluorouracil/Gemcitabine/Irinotecan/Paclitaxel (chemotherapy), Leucovorin (folate analog), CX4945 (CK2 inhibitor), DS-8201a/Topotecan (topoisomerase I inhibitor), Cediranib (VEGFRi), Durvalumab/Pembrolizumab/Avelumab

(anti-PD-L1), Olaparib/Talazoparib/Niraparib/Veliparib (PARPi), Acalabrutinib (Bruton's TKI). Abbreviations: anr (active non recruiting), AST (advanced solid tumors), BC (breast cancer), BM (brain metastases), C (cancer), c (completed), CLL (chronic lymphocytic leukemia), CRPC (castration-resistant prostate cancer), DDR (DNA damage repair), GB (glioblastoma), GEJC (gastric or gastroesophageal junction cancer), HNSCC (head and neck squamous cell carcinoma), HRR (homologous recombination repair), LMD (malignant leptomenin-geal disease), m (metastatic), mut (mutant/mutated/mutations), NA (not applicable), NET (neuroendocrine tumors), ns (not specified), NSCLC (non-small cell lung cancer), OC (ovarian cancer), PDA (pancreatic adenocarcinoma), PD-NEC (poorly differentiated neuroendocrine carcinoma), PFTC (peritoneal, or fallopian tube cancer), r (recruiting), RT (radiotherapy), s (suspended), SCC (small cell cancer), SCLC (small cell lung cancer), ST (solid tumours), TNBC (triple-negative breast cancer), u (unresectable), UC (urothelial cancer), \* “BRCAness” signature.

**Table S2.** Cancer radiopharmaceuticals targeting DDR kinases.

| Target | Drug                    | Type | Label                                    | Stage              | Study Population/Cancer Type        | Reference  |
|--------|-------------------------|------|------------------------------------------|--------------------|-------------------------------------|------------|
| ATM    | AZD1390                 | SM   | [ <sup>11</sup> C]                       | C                  | Healthy subjects                    | [3,4]      |
|        | AZD1390 and AZD0156     | SM   | [ <sup>11</sup> C]                       | PC                 | NHP                                 | [5]        |
| ATR    | VE-821                  | SM   | [ <sup>18</sup> F]                       | PC                 | GB                                  | [6]        |
| CHK1/2 | Prexasertib (LY2606368) | SM   | [ <sup>14</sup> C]                       | C                  | AST                                 | [7]        |
|        | LY2603618 (rabusertib)  | SM   | [ <sup>14</sup> C]                       | C                  | AST                                 | [8]        |
| CHK1   | GDC-0425                | SM   | [ <sup>14</sup> C]                       | PC                 | Healthy rats                        | [9]        |
| PARP   | Olaparib                | SM   | [ <sup>18</sup> F]                       | C                  | Non-specified brain tumour type     | [4]        |
|        |                         |      |                                          | C                  | Non-specified brain tumour type, GB | [10]       |
|        |                         |      |                                          | PC                 | GB                                  | [11–14]    |
|        |                         |      |                                          | C                  | H&N                                 | [4,15]     |
|        |                         |      | [ <sup>123</sup> I]                      | PC                 | PaC, NHP                            | [16,17]    |
|        |                         |      |                                          | PC                 | OC, BC, PaC, SCLC, H&N, DLBCL       | [18–23]    |
|        |                         |      |                                          | PC                 | GB                                  | [24]       |
|        |                         |      |                                          | PC                 | GB                                  | [25]       |
|        |                         |      | [ <sup>64</sup> Cu]                      | PC                 | Mesothelioma                        | [26]       |
|        |                         |      |                                          | [ <sup>11</sup> C] | Syn                                 | [27]       |
|        | Rucaparib               | SM   | [ <sup>18</sup> F]                       | PC                 | PrC                                 | [28]       |
|        |                         |      |                                          | C                  | OC, PeC, PrC, PaC, BC, FTC          | [4,29,30]  |
|        |                         |      | [ <sup>125</sup> I]                      | C                  | GB                                  | [4]        |
|        |                         |      |                                          | PC                 | BC, OC, PrC                         | [29,31–34] |
|        |                         |      | [ <sup>14</sup> C]                       | PC                 | PrC                                 | [31]       |
|        |                         |      |                                          | PC                 | OC, HCC, BC, NB                     | [35–38]    |
|        |                         |      | [ <sup>211</sup> At]                     | PC                 | BC                                  | [36]       |
|        |                         |      |                                          | C                  | AST                                 | [39]       |
|        |                         |      | [ <sup>131</sup> I], [ <sup>124</sup> I] | PC                 | NB                                  | [40,41]    |
|        |                         |      |                                          | C                  | Advanced cancer                     | [42]       |
|        | MAPi*                   | SM   | [ <sup>123</sup> I]                      | PC                 | GB                                  | [43]       |
|        | I2-PARPi                | SM   | [ <sup>131</sup> I], [ <sup>124</sup> I] | PC                 | GB                                  | [44]       |

|        |                                       |    |                    |     |                  |      |
|--------|---------------------------------------|----|--------------------|-----|------------------|------|
|        | Pirenzepine and metabolite LS<br>75   | SM | [ <sup>18</sup> F] | PC  | Syn              | [45] |
| DNA-PK | Samotolisib derivative<br>(LY3023414) | SM | [ <sup>14</sup> C] | C   | Healthy subjects | [4]  |
|        | chromen-4 derivatives                 | SM | [ <sup>11</sup> C] | Syn | /                | [46] |

Therapeutic radionuclides are highlighted in italics. Applications in glioblastoma are highlighted in bold. \*Meitner-Auger PARP1 inhibitor. Abbreviations: AST (advanced solid tumours), BC (breast cancer), C (clinical study), DLBCL (diffuse large B-cell lymphoma), FTC (fallopian tube cancer), GB (glioblastoma), H&N (head and neck cancer), HCC (hepatocellular carcinoma), NB (neuroblastoma), NHP (non-human primates), OC (ovarian cancer), PaC (pancreas cancer), PC (preclinical study), PeC (peritoneal cancer), PrC (prostate cancer), SCLC (small cell lung cancer), Syn (only synthesized).

## References

- Kim, S.T.; Smith, S.A.; Mortimer, P.; Loembé, A.B.; Cho, H.; Kim, K.M.; Smith, C.; Willis, S.; Irurzun-Arana, I.; Berges, A.; et al. Phase I Study of Ceralasertib (AZD6738), a Novel DNA Damage Repair Agent, in Combination with Weekly Paclitaxel in Refractory Cancer. *Clin Cancer Res* **2021**, *27*, 4700–4709, doi:10.1158/1078-0432.ccr-21-0251.
- Yap, T.A.; Krebs, M.G.; Postel-Vinay, S.; El-Khouiery, A.; Soria, J.C.; Lopez, J.; Berges, A.; Cheung, S.Y.A.; Irurzun-Arana, I.; Goldwin, A.; et al. Ceralasertib (AZD6738), an oral ATR kinase inhibitor, in combination with carboplatin in patients with advanced solid tumors: a Phase I study. *Clin Cancer Res* **2021**, *27*, 5213–5224, doi:10.1158/1078-0432.ccr-21-1032.
- Jucaite, A.; Stenckrona, P.; Cselényi, Z.; De Vita, S.; Buil-Bruna, N.; Varnäs, K.; Savage, A.; Varrone, A.; Johnström, P.; Schou, M.; et al. Brain exposure of the ATM inhibitor AZD1390 in humans—a positron emission tomography study. *Neuro Oncol* **2021**, *23*, 687–696, doi:10.1093/neuonc/noaa238.
- Clinicaltrials.gov. Available online: <https://clinicaltrials.gov/ct2/home> (accessed on 7 October 2021).
- Durant, S.T.; Zheng, L.; Wang, Y.; Chen, K.; Zhang, L.; Zhang, T.; Yang, Z.; Riches, L.; Trinidad, A.G.; Fok, J.H.L.; et al. The brain-penetrant clinical ATM inhibitor AZD1390 radiosensitizes and improves survival of preclinical brain tumor models. *Sci Adv* **2018**, *4*, eaat1719, doi:10.1126/sciadv.aat1719.
- Carlucci, G.; Carney, B.; Sadique, A.; Vansteene, A.; Tang, J.; Reiner, T. Evaluation of [(18)F]-ATRI as PET tracer for in vivo imaging of ATR in mouse models of brain cancer. *Nucl Med Biol* **2017**, *48*, 9–15, doi:10.1016/j.nucmedbio.2017.01.002.
- Wickremsinhe, E.R.; Hynes, S.M.; Payne, C.D.; Guo, Y.; Cassidy, K.C. Disposition of [(14)C]LY2606368 following intravenous administration in patients with advanced and/or metastatic solid tumours. *Xenobiotica* **2020**, *50*, 793–804, doi:10.1080/00498254.2019.1702736.
- Wickremsinhe, E.R.; Hynes, S.M.; Palmieri, M.D.; Mitchell, M.I.; Abraham, T.L.; Rehm, J.F.; Chana, E.; Jost, L.M.; Cassidy, K.C. Disposition and metabolism of LY2603618, a Chk-1 inhibitor following intravenous administration in patients with advanced and/or metastatic solid tumors. *Xenobiotica* **2014**, *44*, 827–841, doi:10.3109/00498254.2014.900589.
- Takahashi, R.H.; Halladay, J.S.; Siu, M.; Chen, Y.; Hop, C.E.; Khojasteh, S.C.; Ma, S. Novel Mechanism of Decyanation of GDC-0425 by Cytochrome P450. *Drug Metab Dispos* **2017**, *45*, 430–440, doi:10.1124/dmd.116.074336.
- Young, R.J.; Demétrio De Souza França, P.; Pirovano, G.; Piotrowski, A.F.; Nicklin, P.J.; Riedl, C.C.; Schwartz, J.; Bale, T.A.; Donabedian, P.L.; Kossatz, S.; et al. Preclinical and first-in-human-brain-cancer applications of [(18)F]poly (ADP-ribose) polymerase inhibitor PET/MR. *Neurooncol Adv* **2020**, *2*, vdaa119, doi:10.1093/oaajnl/vdaa119.
- Donabedian, P.L.; Kossatz, S.; Engelbach, J.A.; Jannetti, S.A.; Carney, B.; Young, R.J.; Weber, W.A.; Garbow, J.R.; Reiner, T. Discriminating radiation injury from recurrent tumor with [(18)F]PARPi and amino acid PET in mouse models. *EJNMMI Res* **2018**, *8*, 59, doi:10.1186/s13550-018-0399-z.
- Carlucci, G.; Carney, B.; Brand, C.; Kossatz, S.; Irwin, C.P.; Carlin, S.D.; Keliher, E.J.; Weber, W.; Reiner, T. Dual-Modality Optical/PET Imaging of PARP1 in Glioblastoma. *Mol Imaging Biol* **2015**, *17*, 848–855, doi:10.1007/s11307-015-0858-0.
- Carney, B.; Carlucci, G.; Salinas, B.; Di Gialleonardo, V.; Kossatz, S.; Vansteene, A.; Longo, V.A.; Bolaender, A.; Chiosis, G.; Keshari, K.R.; et al. Non-invasive PET Imaging of PARP1 Expression in Glioblastoma Models. *Mol Imaging Biol* **2016**, *18*, 386–392, doi:10.1007/s11307-015-0904-y.
- Zmuda, F.; Blair, A.; Liuzzi, M.C.; Malviya, G.; Chalmers, A.J.; Lewis, D.; Sutherland, A.; Pimlott, S.L. An (18)F-Labeled Poly(ADP-ribose) Polymerase Positron Emission Tomography Imaging Agent. *J Med Chem* **2018**, *61*, 4103–4114, doi:10.1021/acs.jmedchem.8b00138.
- Schöder, H.; França, P.D.S.; Nakajima, R.; Burnazi, E.; Roberts, S.; Brand, C.; Grkovski, M.; Mauguén, A.; Dunphy, M.P.; Ghossein, R.A.; et al. Safety and Feasibility of PARP1/2 Imaging with (18)F-PARPi in Patients with Head and Neck Cancer. *Clin Cancer Res* **2020**, *26*, 3110–3116, doi:10.1158/1078-0432.ccr-19-3484.

16. Guibbal, F.; Hopkins, S.L.; Pacelli, A.; Isenegger, P.G.; Mosley, M.; Torres, J.B.; Dias, G.M.; Mahaut, D.; Hueting, R.; Gouverneur, V.; et al. [(18)F]AZD2461, an Insight on Difference in PARP Binding Profiles for DNA Damage Response PET Imaging. *Mol Imaging Biol* **2020**, *22*, 1226–1234, doi:10.1007/s11307-020-01497-6.
17. Reilly, S.W.; Puentes, L.N.; Schmitz, A.; Hsieh, C.J.; Weng, C.C.; Hou, C.; Li, S.; Kuo, Y.M.; Padakanti, P.; Lee, H.; et al. Synthesis and evaluation of an AZD2461 [(18)F]PET probe in non-human primates reveals the PARP-1 inhibitor to be non-blood-brain barrier penetrant. *Bioorg Chem* **2019**, *83*, 242–249, doi:10.1016/j.bioorg.2018.10.015.
18. Reiner, T.; Keliher, E.J.; Earley, S.; Marinelli, B.; Weissleder, R. Synthesis and in vivo imaging of a 18F-labeled PARP1 inhibitor using a chemically orthogonal scavenger-assisted high-performance method. *Angew Chem Int Ed Engl* **2011**, *50*, 1922–1925, doi:10.1002/anie.201006579.
19. Laird, J.; Lok, B.H.; Carney, B.; Kossatz, S.; de Stanchina, E.; Reiner, T.; Poirier, J.T.; Rudin, C.M. Positron-Emission Tomographic Imaging of a Fluorine 18-Radiolabeled Poly(ADP-Ribose) Polymerase 1 Inhibitor Monitors the Therapeutic Efficacy of Talazoparib in SCLC Patient-Derived Xenografts. *J Thorac Oncol* **2019**, *14*, 1743–1752, doi:10.1016/j.jtho.2019.05.032.
20. Carney, B.; Kossatz, S.; Lok, B.H.; Schneeberger, V.; Gangangari, K.K.; Pillarsetty, N.V.K.; Weber, W.A.; Rudin, C.M.; Poirier, J.T.; Reiner, T. Target engagement imaging of PARP inhibitors in small-cell lung cancer. *Nat Commun* **2018**, *9*, 176, doi:10.1038/s41467-017-02096-w.
21. Demétrio de Souza França, P.; Roberts, S.; Kossatz, S.; Guru, N.; Mason, C.; Zanon, D.K.; Abrahão, M.; Schöder, H.; Ganly, I.; Patel, S.G.; et al. Fluorine-18 labeled poly (ADP-ribose) polymerase1 inhibitor as a potential alternative to 2-deoxy-2-[(18)F]fluoro-d-glucose positron emission tomography in oral cancer imaging. *Nucl Med Biol* **2020**, *84–85*, 80–87, doi:10.1016/j.nucmedbio.2020.01.004.
22. Tang, J.; Salloum, D.; Carney, B.; Brand, C.; Kossatz, S.; Sadique, A.; Lewis, J.S.; Weber, W.A.; Wendel, H.G.; Reiner, T. Targeted PET imaging strategy to differentiate malignant from inflamed lymph nodes in diffuse large B-cell lymphoma. *Proc Natl Acad Sci U S A* **2017**, *114*, E7441–e7449, doi:10.1073/pnas.1705013114.
23. Wilson, T.C.; Xavier, M.A.; Knight, J.; Verhoog, S.; Torres, J.B.; Mosley, M.; Hopkins, S.L.; Wallington, S.; Allen, P.D.; Kersemans, V.; et al. PET Imaging of PARP Expression Using (18)F-Olaparib. *J Nucl Med* **2019**, *60*, 504–510, doi:10.2967/jnumed.118.213223.
24. Zmuda, F.; Malviya, G.; Blair, A.; Boyd, M.; Chalmers, A.J.; Sutherland, A.; Pimlott, S.L. Synthesis and Evaluation of a Radioiodinated Tracer with Specificity for Poly(ADP-ribose) Polymerase-1 (PARP-1) in Vivo. *J Med Chem* **2015**, *58*, 8683–8693, doi:10.1021/acs.jmedchem.5b01324.
25. Jannetti, S.A.; Carlucci, G.; Carney, B.; Kossatz, S.; Shenker, L.; Carter, L.M.; Salinas, B.; Brand, C.; Sadique, A.; Donabedian, P.L.; et al. PARP-1-Targeted Radiotherapy in Mouse Models of Glioblastoma. *J Nucl Med* **2018**, *59*, 1225–1233, doi:10.2967/jnumed.117.205054.
26. Huang, T.; Hu, P.; Banizs, A.B.; He, J. Initial evaluation of Cu-64 labeled PARPi-DOTA PET imaging in mice with mesothelioma. *Bioorg Med Chem Lett* **2017**, *27*, 3472–3476, doi:10.1016/j.bmcl.2017.05.077.
27. Andersen, T.L.; Friis, S.D.; Audrain, H.; Nordeman, P.; Antoni, G.; Skrydstrup, T. Efficient 11C-carbonylation of isolated aryl palladium complexes for PET: application to challenging radiopharmaceutical synthesis. *J Am Chem Soc* **2015**, *137*, 1548–1555, doi:10.1021/ja511441u.
28. Zhou, D.; Chen, H.; Mpoy, C.; Afrin, S.; Rogers, B.E.; Garbow, J.R.; Katzenellenbogen, J.A.; Xu, J. Radiosynthesis and Evaluation of Talazoparib and Its Derivatives as PARP-1-Targeting Agents. *Biomedicines* **2021**, *9*, 565, doi:10.3390/biomedicines9050565.
29. Makvandi, M.; Pantel, A.; Schwartz, L.; Schubert, E.; Xu, K.; Hsieh, C.J.; Hou, C.; Kim, H.; Weng, C.C.; Winters, H.; et al. A PET imaging agent for evaluating PARP-1 expression in ovarian cancer. *J Clin Invest* **2018**, *128*, 2116–2126, doi:10.1172/jci97992.
30. Michel, L.S.; Dyroff, S.; Brooks, F.J.; Spayd, K.J.; Lim, S.; Engle, J.T.; Phillips, S.; Tan, B.; Wang-Gillam, A.; Bogner, C.; et al. PET of Poly (ADP-Ribose) Polymerase Activity in Cancer: Preclinical Assessment and First In-Human Studies. *Radiology* **2017**, *282*, 453–463, doi:10.1148/radiol.2016161929.
31. Zhou, D.; Xu, J.; Mpoy, C.; Chu, W.; Kim, S.H.; Li, H.; Rogers, B.E.; Katzenellenbogen, J.A. Preliminary evaluation of a novel (18)F-labeled PARP-1 ligand for PET imaging of PARP-1 expression in prostate cancer. *Nucl Med Biol* **2018**, *66*, 26–31, doi:10.1016/j.nucmedbio.2018.08.003.
32. Zhou, D.; Chu, W.; Xu, J.; Jones, L.A.; Peng, X.; Li, S.; Chen, D.L.; Mach, R.H. Synthesis, [<sup>18</sup>F] radiolabeling, and evaluation of poly (ADP-ribose) polymerase-1 (PARP-1) inhibitors for in vivo imaging of PARP-1 using positron emission tomography. *Bioorg Med Chem* **2014**, *22*, 1700–1707, doi:10.1016/j.bmc.2014.01.019.
33. Sander Effron, S.; Makvandi, M.; Lin, L.; Xu, K.; Li, S.; Lee, H.; Hou, C.; Pryma, D.A.; Koch, C.; Mach, R.H. PARP-1 Expression Quantified by [(18)F]FluorThanatrace: A Biomarker of Response to PARP Inhibition Adjuvant to Radiation Therapy. *Cancer Biother Radiopharm* **2017**, *32*, 9–15, doi:10.1089/cbr.2016.2133.
34. Edmonds, C.E.; Makvandi, M.; Lieberman, B.P.; Xu, K.; Zeng, C.; Li, S.; Hou, C.; Lee, H.; Greenberg, R.A.; Mankoff, D.A.; et al. [(18)F]FluorThanatrace uptake as a marker of PARP1 expression and activity in breast cancer. *Am J Nucl Med Mol Imaging* **2016**, *6*, 94–101.

35. Makvandi, M.; Xu, K.; Lieberman, B.P.; Anderson, R.C.; Effron, S.S.; Winters, H.D.; Zeng, C.; McDonald, E.S.; Pryma, D.A.; Greenberg, R.A.; et al. A Radiotracer Strategy to Quantify PARP-1 Expression In Vivo Provides a Biomarker That Can Enable Patient Selection for PARP Inhibitor Therapy. *Cancer Res* **2016**, *76*, 4516–4524, doi:10.1158/0008-5472.can-16-0416.
36. Anderson, R.C.; Makvandi, M.; Xu, K.; Lieberman, B.P.; Zeng, C.; Pryma, D.A.; Mach, R.H. Iodinated benzimidazole PARP radiotracer for evaluating PARP1/2 expression in vitro and in vivo. *Nucl Med Biol* **2016**, *43*, 752–758, doi:10.1016/j.nucmedbio.2016.08.007.
37. Lee, H.; Riad, A.; Martorano, P.; Mansfield, A.; Samanta, M.; Batra, V.; Mach, R.H.; Maris, J.M.; Pryma, D.A.; Makvandi, M. PARP-1-Targeted Auger Emitters Display High-LET Cytotoxic Properties In Vitro but Show Limited Therapeutic Utility in Solid Tumor Models of Human Neuroblastoma. *J Nucl Med* **2020**, *61*, 850–856, doi:10.2967/jnumed.119.233965.
38. Riad, A.; Gitto, S.B.; Lee, H.; Winters, H.D.; Martorano, P.M.; Hsieh, C.J.; Xu, K.; Omran, D.K.; Powell, D.J., Jr.; Mach, R.H.; et al. PARP Theranostic Auger Emitters Are Cytotoxic in BRCA Mutant Ovarian Cancer and Viable Tumors from Ovarian Cancer Patients Enable Ex-Vivo Screening of Tumor Response. *Molecules* **2020**, *25*, 6029, doi:10.3390/molecules25246029.
39. Liao, M.; Watkins, S.; Nash, E.; Isaacson, J.; Etter, J.; Beltman, J.; Fan, R.; Shen, L.; Mutlib, A.; Kemeny, V.; et al. Evaluation of absorption, distribution, metabolism, and excretion of [(14)C]-rucaparib, a poly(ADP-ribose) polymerase inhibitor, in patients with advanced solid tumors. *Invest New Drugs* **2020**, *38*, 765–775, doi:10.1007/s10637-019-00815-2.
40. Makvandi, M.; Lee, H.; Puentes, L.N.; Reilly, S.W.; Rath, K.S.; Weng, C.C.; Chan, H.S.; Hou, C.; Raman, P.; Martinez, D.; et al. Targeting PARP-1 with Alpha-Particles Is Potently Cytotoxic to Human Neuroblastoma in Preclinical Models. *Mol Cancer Ther* **2019**, *18*, 1195–1204, doi:10.1158/1535-7163.mct-18-0837.
41. Reilly, S.W.; Makvandi, M.; Xu, K.; Mach, R.H. Rapid Cu-Catalyzed [(211)At]Astatination and [(125)I]Iodination of Boronic Esters at Room Temperature. *Org Lett* **2018**, *20*, 1752–1755, doi:10.1021/acs.orglett.8b00232.
42. Mu, S.; Palmer, D.; Fitzgerald, R.; Andreu-Vieyra, C.; Zhang, H.; Tang, Z.; Su, D.; Sahasranaman, S. Human Mass Balance and Metabolite Profiling of [(14) C]-Pamiparib, a Poly (ADP-Ribose) Polymerase Inhibitor, in Patients With Advanced Cancer. *Clin Pharmacol Drug Dev* **2021**, *10*, 1108–1120, doi:10.1002/cpdd.943.
43. Pirovano, G.; Jannetti, S.A.; Carter, L.M.; Sadique, A.; Kossatz, S.; Guru, N.; Demétrio De Souza França, P.; Maeda, M.; Zeglis, B.M.; Lewis, J.S.; et al. Targeted Brain Tumor Radiotherapy Using an Auger Emitter. *Clin Cancer Res* **2020**, *26*, 2871–2881, doi:10.1158/1078-0432.ccr-19-2440.
44. Salinas, B.; Irwin, C.P.; Kossatz, S.; Bolaender, A.; Chiosis, G.; Pillarsetty, N.; Weber, W.A.; Reiner, T. Radioiodinated PARP1 tracers for glioblastoma imaging. *EJNMMI Res* **2015**, *5*, 123, doi:10.1186/s13550-015-0123-1.
45. Riss, P.J., Soskic, V., Schrattenholz, A., and Roesch, F. Synthesis and radiosynthesis of N5-[18F]fluoroethyl-pirenzepine and its metabolite N5-[18F]fluoroethyl-LS 75. *J Labelled Comp Radiopharm* **2009**, *52*, 576–579, doi:10.1002/jlcr.1687.
46. Gao, M.; Wang, M.; Miller, K.D.; Zheng, Q.H. Simple synthesis of carbon-11-labeled chromen-4-one derivatives as new potential PET agents for imaging of DNA-dependent protein kinase (DNA-PK) in cancer. *Appl Radiat Isot* **2012**, *70*, 1558–1563, doi:10.1016/j.apradiso.2012.04.023.

**Publisher’s Note:** MDPI stays neutral with regard to jurisdictional claims in published maps and institutional affiliations.

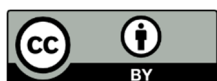

© 2022 by the authors. Licensee MDPI, Basel, Switzerland. This article is an open access article distributed under the terms and conditions of the Creative Commons Attribution (CC BY) license (<http://creativecommons.org/licenses/by/4.0/>).
